# Supplementary material
Source: ML conference proceedings conference paper supplement (https://proceedings.neurips.cc/paper_files/paper/2013/hash/6e2713a6efee97bacb63e52c54f0ada0-Abstract.html)
Supplement: Supplementary file [file 6e2713a6efee97bacb63e52c54f0ada0-Supplemental.zip]

---

# A Comparative Framework for Preconditioned Lasso Algorithms — Supplementary Material —

---

## 1 Preconditioning Algorithms

In this section we briefly show how to express PBHT and HJ in a framework that runs Lasso on modified variables  $P_X X$  and  $P_y y$ .

### 1.1 Huang and Jojic [1] (HJ)

Consider the SVD  $X = UDV^\top$ , where  $U$  is  $n \times n$ ,  $V$  is  $p \times p$  and  $D$  is an  $n \times p$  “diagonal” matrix with entries  $d_1 < \dots < d_n^1$ . Define two groups of left and right singular vectors associated with the  $q$  smallest and  $n - q$  largest singular values. Let the groups be defined by  $U_q, U_{n-q}$  and  $V_q, V_{n-q}$ . Suppose HJ chooses as its row-basis the  $n - q$  largest right singular vectors,  $V_{n-q}$ . Then, from Table 1 of Huang and Jojic [1] we find that

$$Z = XV_{n-q} = U_{n-q} \text{diag}(\{d_j\}_{j>q}) \quad (1)$$

$$\bar{X} = R = X - ZV_{n-q}^\top \quad (2)$$

$$= X - U_{n-q} \text{diag}(\{d_j\}_{j>q}) V_{n-q}^\top \quad (3)$$

$$= U_q \text{diag}(\{d_i\}_{i \leq q}) V_q^\top \quad (4)$$

$$= U_q U_q^\top X \quad (5)$$

$$\bar{y} = y - Z(Z^\top Z)^{-1} Z^\top y \quad (6)$$

$$= y - U_{n-q} U_{n-q}^\top y \quad (7)$$

$$= U_q U_q^\top y \quad (8)$$

So HJ sets  $P_X = P_y = U_{\mathcal{A}} U_{\mathcal{A}}^\top$  for a suitably estimated subspace  $U_{\mathcal{A}}$

### 1.2 Paul et al. [2] (PBHT)

Suppose PBHT identifies as  $X_q$  the  $q$  columns of  $X$  that are most correlated with  $y$  (i.e., where  $|X_j^\top y|/\|X_j\|_2$  is largest). Consider the SVD  $X_q = UDV^\top$ , where  $U$  is  $n \times n$ ,  $V$  is  $q \times q$  and  $D$  is  $n \times q$ . Paul et al. [2] use  $V$  to find the projection matrix  $P_q$ . Let the columns of  $V$  be denoted by  $v_{q'}$  and those of  $U$  by  $u_{q'}$ . From Section 4.5 and Eq. (13) in Paul et al. [2]<sup>2</sup>.

$$P_q = \sum_{q'=1}^q \frac{1}{\|X_q v_{q'}\|_2^2} X_q v_{q'} v_{q'}^\top X_q^\top \quad (9)$$

$$= \sum_{q'=1}^q \frac{1}{d_{q'}^2} u_{q'} d_{q'}^2 u_{q'}^\top = U_q U_q^\top \quad (10)$$

$$\bar{X} = X \quad (11)$$

$$\bar{y} = P_q y = U_q U_q^\top y, \quad (12)$$

where  $U_q$  consists of the first  $q$  columns of  $U$ . Thus, PBHT sets  $P_X = I_{n \times n}$  and  $P_y = U_{\mathcal{A}} U_{\mathcal{A}}^\top$  for a suitably estimated subspace  $U_{\mathcal{A}}$

<sup>1</sup>For ease of presentation, we let the  $d_i$  be distinct.

<sup>2</sup>Note that they switch  $V$  with  $U$  relative to our notation.



## 2 Proof of Lemma 1

**Lemma 1.** *Suppose that  $X_S^\top X_S$  is invertible,  $|\mu_j| < 1 \ \forall j \in S^c$  and  $\text{sgn}(\beta_i^*)\gamma_i > 0 \ \forall i \in S$ . Then the Lasso has a unique solution  $\hat{\beta}$  which recovers the signed support (i.e.,  $S_\pm(\hat{\beta}) = S_\pm(\beta^*)$ ) if and only if  $\lambda_l < \lambda < \lambda_u$ , where*

$$\lambda_l = \max_{j \in S^c} \frac{\eta_j}{(2\mathbb{I}[\eta_j > 0] - 1) - \mu_j} \quad \lambda_u = \min_{i \in S} \left| \frac{\beta_i^* + \epsilon_i}{\gamma_i} \right|_+, \quad (13)$$

$\mathbb{I}[\cdot]$  denotes the indicator function and  $|\cdot|_+ = \max(0, \cdot)$  denotes the hinge function. On the other hand, if  $X_S^\top X_S$  is not invertible, then the signed support cannot in general be recovered.

*Proof.* For a particular choice of  $\lambda$ , and instances  $X, \beta^*, w$ , Lemmas 2 and 3 of Wainwright give conditions under which Lasso produces a unique  $\hat{\beta}$  which recovers the signed support. If  $X_S^\top X_S$  is invertible, then by Lemmas 2 and 3

$$S_\pm(\hat{\beta}) = S_\pm(\beta^*) \iff \forall j \in S^c \ |Z_j| < 1 \text{ and } \forall i \in S \ \text{sgn}(\beta_i^* + \Delta_i) = \text{sgn}(\beta_i^*), \quad (14)$$

where

$$Z_j \triangleq \mu_j + \frac{1}{\lambda} \eta_j \quad (15)$$

$$\mu_j = X_j^\top X_S (X_S^\top X_S)^{-1} \text{sgn}(\beta_S^*) \quad (16)$$

$$\eta_j = X_j^\top \left( I_{n \times n} - X_S (X_S^\top X_S)^{-1} X_S^\top \right) \frac{w}{n} \quad (17)$$

$$\Delta_i \triangleq \epsilon_i - \lambda \gamma_i \quad (18)$$

$$\epsilon_i = e_i^\top \left( \frac{1}{n} X_S^\top X_S \right)^{-1} \frac{1}{n} X_S^\top w \quad (19)$$

$$\gamma_i = e_i^\top \left( \frac{1}{n} X_S^\top X_S \right)^{-1} \text{sgn}(\beta_S^*) \quad (20)$$

We can invert Lemmas 2 and 3 and derive from them conditions on  $\lambda$  so that signed support recovery can be guaranteed.

**Ensure**  $\forall j \in S^c, |Z_j| < 1$

For this to hold, we need  $\forall j \in S^c$ ,

$$|Z_j| = \left| \mu_j + \frac{1}{\lambda} \eta_j \right| < 1. \quad (21)$$

Since we assumed that  $|\mu_j| < 1 \ \forall j \in S^c$ , we have:

**Case 1a:**  $\eta_j \geq 0$

We need for every  $j \in S^c$

$$\mu_j + \frac{1}{\lambda} \eta_j < 1 \quad (22)$$

$$\frac{1}{\lambda} \eta_j < 1 - \mu_j \quad (23)$$

$$\lambda > \frac{\eta_j}{1 - \mu_j} \quad (24)$$



**Case 1b:**  $\eta_j \leq 0$

We need for every  $j \in S^c$

$$\mu_j + \frac{1}{\lambda} \eta_j > -1 \quad (25)$$

$$\frac{1}{\lambda} \eta_j > -1 - \mu_j \quad (26)$$

$$\lambda > -\frac{\eta_j}{1 + \mu_j} = \frac{\eta_j}{-1 - \mu_j}. \quad (27)$$

Combining, we need

$$\lambda > \lambda_l = \max_{j \in S^c} \frac{\eta_j}{(2\llbracket \eta_j > 0 \rrbracket - 1) - \mu_j} \geq 0. \quad (28)$$

**Ensure**  $\forall i \in S, \text{sgn}(\beta_i^* + \Delta_i) = \text{sgn}(\beta_i^*)$

Since we assumed  $\text{sgn}(\beta_i^*)\gamma_i > 0 \ \forall i \in S$ , we have in particular that  $\gamma_i \neq 0$ . Then

**Case 2a:**  $\beta_i^* > 0$

Since  $\text{sgn}(\beta_i^*)\gamma_i > 0$ , we have  $\gamma_i > 0$ . Then we need

$$\beta_i^* + \Delta_i = \beta_i^* + \epsilon_i - \lambda\gamma_i > 0 \quad (29)$$

$$\lambda\gamma_i < \beta_i^* + \epsilon_i \quad (30)$$

$$\lambda < \frac{\beta_i^* + \epsilon_i}{\gamma_i} \quad (31)$$

**Case 2b:**  $\beta_i^* < 0$

Since  $\text{sgn}(\beta_i^*)\gamma_i > 0$ , we have  $\gamma_i < 0$ . We need

$$\beta_i^* + \Delta_i = \beta_i^* + \epsilon_i - \lambda\gamma_i < 0 \quad (32)$$

$$\lambda\gamma_i > \beta_i^* + \epsilon_i \quad (33)$$

$$\lambda < \frac{\beta_i^* + \epsilon_i}{\gamma_i} \quad (34)$$

Hence, overall we need

$$\lambda < \min_{i \in S} \frac{\beta_i^* + \epsilon_i}{\gamma_i}. \quad (35)$$

Although the previous equation could be used to make a definition for  $\lambda_u$ , it will be beneficial later if  $\lambda_u \geq 0$ . Because  $\lambda_l \geq 0$ , signed support recovery will not be possible whenever  $\min_{i \in S} (\beta_i^* + \epsilon_i)/\gamma_i \leq 0$ . Thus, we will define

$$\lambda_u = \min_{i \in S} \left| \frac{\beta_i^* + \epsilon_i}{\gamma_i} \right|_+, \quad (36)$$

where  $|\cdot|_+ = \max(0, \cdot)$  is the hinge function. Signed support recovery occurs iff  $\lambda_l < \lambda < \lambda_u$ . On the other hand, if  $X_S^\top X_S$  is not invertible, the columns of  $X_S$  are linearly dependent and so the signed support cannot be recovered in general.  $\square$



### 3 Proofs of Section 4

To simplify the proofs of Section 4, we will make repeated use of the following lemma.

**Lemma 2.** *Suppose  $U, V$  are orthonormal bases for subspaces lying in  $\mathbb{R}^n$ . That is,  $U$  is  $n \times q$ , with  $q \leq n$  and  $U^\top U = I_{q \times q}$ , and  $V$  is  $n \times r$ , with  $r \leq n$  and  $V^\top V = I_{r \times r}$ . Suppose the matrix  $B$  has a column space spanned by  $U$ . If  $\text{span}(U) \subseteq \text{span}(V)$*

$$VV^\top B = B \tag{37}$$

*Proof.* Because  $B$  has a column space spanned by  $U$ , we can write  $B = UR$  for some matrix  $R$ . Furthermore, because  $\text{span}(U) \subseteq \text{span}(V)$ , we may write  $U = VT$ , for some  $r \times q$  matrix  $T$ , with  $q \leq r$ . Indeed we know that  $T$  has orthonormal columns, since  $U^\top U = T^\top V^\top VT = T^\top T = I_{q \times q}$ . Hence, we can write  $B = VTR$ , where  $T$  is some orthonormal matrix. Now

$$VV^\top B = VV^\top VTR = VTR = B. \tag{38}$$

□



### 3.1 Proof of Theorem 1

**Theorem 1.** Suppose that the conditions of Lemma 1 are met for a fixed instance of  $X, \beta^*$ . If  $\text{span}(U_S) \subseteq \text{span}(U_A)$ , then after preconditioning using HJ the conditions continue to hold, and

$$\frac{\lambda_u}{\lambda_l} \preceq \frac{\bar{\lambda}_u}{\bar{\lambda}_l}, \quad (39)$$

where the stochasticity on both sides is due to independent noise vectors  $w$ . On the other hand, if  $X_S^\top P_X^\top P_X X_S$  is not invertible then HJ cannot in general recover the signed support.

*Proof.* We have  $P_X = P_y = U_A U_A^\top$ . With this,  $\bar{w} = U_A U_A^\top w$ . First, consider the case that  $\text{span}(U_S) \subseteq \text{span}(U_A)$ . Using Lemmas 1 and 2 we have

$$\bar{\mu}_j = X_j^\top U_A U_A^\top U_A U_A^\top X_S (X_S^\top U_A U_A^\top U_A U_A^\top X_S)^{-1} \text{sgn}(\beta_S^*) \quad (40)$$

$$= X_j^\top X_S (X_S^\top X_S)^{-1} \text{sgn}(\beta_S^*) = \mu_j \quad (41)$$

$$\bar{\gamma}_i = e_i^\top \left( \frac{1}{n} X_S^\top U_A U_A^\top U_A U_A^\top X_S \right)^{-1} \text{sgn}(\beta_S^*) \quad (42)$$

$$= e_i^\top \left( \frac{1}{n} X_S^\top X_S \right)^{-1} \text{sgn}(\beta_S^*) = \gamma_i \quad (43)$$

$$\bar{\eta}_j = X_j^\top U_A U_A^\top (I_{n \times n} - U_A U_A^\top X_S (X_S^\top U_A U_A^\top U_A U_A^\top X_S)^{-1} X_S^\top U_A U_A^\top) U_A U_A^\top \frac{w}{n} \quad (44)$$

$$= X_j^\top U_A U_A^\top (I_{n \times n} - X_S (X_S^\top X_S)^{-1} X_S^\top) U_A U_A^\top \frac{w}{n} \quad (45)$$

$$= X_j^\top U_A U_A^\top (I_{n \times n} - U_S U_S^\top) U_A U_A^\top \frac{w}{n} \quad (46)$$

$$= X_j^\top (U_A U_A^\top - U_S U_S^\top U_A U_A^\top) \frac{w}{n} \quad (47)$$

$$= X_j^\top (I_{n \times n} - U_S U_S^\top) U_A U_A^\top \frac{w}{n} \quad (48)$$

$$\bar{\epsilon}_i = e_i^\top \left( \frac{1}{n} X_S^\top U_A U_A^\top U_A U_A^\top X_S \right)^{-1} X_S^\top U_A U_A^\top U_A U_A^\top \frac{w}{n} \quad (49)$$

$$= e_i^\top \left( \frac{1}{n} X_S^\top X_S \right)^{-1} X_S^\top \frac{w}{n} = \epsilon_i. \quad (50)$$

We immediately see that if the conditions of Lemma 1 hold for the original problem (i.e.,  $X_S^\top X_S$  is invertible,  $|\mu_j| < 1 \ \forall j \in S^c$  and  $\text{sgn}(\beta_i^*) \gamma_i > 0 \ \forall i \in S$ ), they continue to hold after preconditioning using HJ (i.e.,  $\bar{X}_S^\top \bar{X}_S$  is invertible,  $|\bar{\mu}_j| < 1 \ \forall j \in S^c$  and  $\text{sgn}(\beta_i^*) \bar{\gamma}_i > 0 \ \forall i \in S$ ). Furthermore, we have  $\bar{\lambda}_u = \lambda_u$ . Next, we must show that  $\bar{\lambda}_l \preceq \lambda_l$ . We will simplify this task as follows. Note that

$$\bar{\lambda}_l = \max_{j \in S^c} \frac{\bar{\eta}_j}{(2\mathbb{I}[\bar{\eta}_j > 0] - 1) - \bar{\mu}_j} = \max \left( \max_{j \in S^c} \frac{\bar{\eta}_j}{-1 - \bar{\mu}_j}, \max_{j \in S^c} \frac{\bar{\eta}_j}{1 - \bar{\mu}_j} \right) \quad (51)$$

$$= \max \left( \left\{ \frac{\bar{\eta}_j}{-1 - \bar{\mu}_j}, \frac{\bar{\eta}_j}{1 - \bar{\mu}_j} \right\}_{j \in S^c} \right) \quad (52)$$

$$\lambda_l = \max_{j \in S^c} \frac{\eta_j}{(2\mathbb{I}[\eta_j > 0] - 1) - \mu_j} = \max \left( \max_{j \in S^c} \frac{\eta_j}{-1 - \mu_j}, \max_{j \in S^c} \frac{\eta_j}{1 - \mu_j} \right) \quad (53)$$

$$= \max \left( \left\{ \frac{\eta_j}{-1 - \mu_j}, \frac{\eta_j}{1 - \mu_j} \right\}_{j \in S^c} \right) \quad (54)$$

where the  $\bar{\mu}_j = \mu_j$  are fixed because  $X, \beta^*$  are fixed. By our derivation in Eq. (48), the effect of preconditioning on  $\eta_j$  can be viewed as further restricting the subspace in which the noise  $w$  lies, while keeping  $X_j$  and  $\mu_j$  fixed. Specifically, in  $\eta_j$ ,  $w$  is pre-multiplied by  $(I_{n \times n} - U_S U_S^\top)$ , while in  $\bar{\eta}_j$  it is pre-multiplied by  $(I_{n \times n} - U_S U_S^\top) U_A U_A^\top$ . Whatever  $U_A$ , the latter projection eliminates



at least as large a subspace as the former. Because the  $X_j$  and  $\bar{\mu}_j = \mu_j$  are fixed, it follows by symmetry of the Gaussian that

$$\bar{\lambda}_l = \max \left( \left\{ \frac{\bar{\eta}_j}{-1 - \bar{\mu}_j}, \frac{\bar{\eta}_j}{1 - \bar{\mu}_j} \right\}_{j \in S^c} \right) \preceq \max \left( \left\{ \frac{\eta_j}{-1 - \mu_j}, \frac{\eta_j}{1 - \mu_j} \right\}_{j \in S^c} \right) = \lambda_l, \quad (55)$$

where the stochasticity is due to the noise  $w$ . Rewriting some of the variables, we observe that  $\bar{\lambda}_l$  and  $\lambda_l$  are both independent of  $\bar{\lambda}_u = \lambda_u$ . Specifically, if  $\text{span}(U_S) \subseteq \text{span}(U_A)$  then using Lemma 2

$$\eta_j = \frac{1}{n} X_j^\top (I_{n \times n} - U_S U_S^\top) w \quad (56)$$

$$\bar{\eta}_j = \frac{1}{n} X_j^\top (I_{n \times n} - U_S U_S^\top) U_A U_A^\top w \quad (57)$$

$$\epsilon_i = \frac{1}{n} e_i^\top \left( \frac{1}{n} X_S^\top X_S \right)^{-1} X_S^\top U_S U_S^\top w \quad (58)$$

$$= \bar{\epsilon}_i = \frac{1}{n} e_i^\top \left( \frac{1}{n} X_S^\top X_S \right)^{-1} X_S^\top U_S U_S^\top U_A U_A^\top w \quad (59)$$

Since the variables  $(I_{n \times n} - U_S U_S^\top) w$  and  $U_S U_S^\top w$  are jointly Gaussian distributed with zero covariance, they are independent. Thus,  $\eta_j$  and  $\epsilon_i = \bar{\epsilon}_i$  are independent, and because randomness is only due to the noise  $w$ , therefore also  $\lambda_l$  and  $\lambda_u = \bar{\lambda}_u$ . By the same reasoning,  $(I_{n \times n} - U_S U_S^\top) U_A U_A^\top w$  and  $U_S U_S^\top U_A U_A^\top w$  are independent. This in turn implies that  $\bar{\lambda}_l$  and  $\bar{\lambda}_u = \lambda_u$  are independent. We now combine these results: Recall that we defined  $1/\bar{\lambda}_l = \infty$  and  $1/\lambda_l = \infty$  if  $\bar{\lambda}_l = 0$  or  $\lambda_l = 0$ . Because  $\bar{\lambda}_l \preceq \lambda_l$  and  $\bar{\lambda}_l \geq 0$ ,  $\lambda_l \geq 0$ , we have that  $1/\lambda_l \preceq 1/\bar{\lambda}_l$ . Next, because both  $1/\bar{\lambda}_l, 1/\lambda_l$  are independent of  $\bar{\lambda}_u = \lambda_u \geq 0$ , we have

$$\frac{\lambda_u}{\lambda_l} \preceq \frac{\bar{\lambda}_u}{\bar{\lambda}_l}. \quad (60)$$

On the other hand, if  $X_S^\top P_X^\top P_X X_S$  is not invertible, the conditions of Lemma 1 are not met, and so signed support recovery is in general not possible.  $\square$



### 3.2 Proof of Theorem 2

**Theorem 2.** Suppose that the conditions of Lemma 1 are met for a fixed instance of  $X, \beta^*$ . If  $\text{span}(U_S) \subseteq \text{span}(U_A)$ , then after preconditioning using PBHT the conditions continue to hold, and

$$\frac{\lambda_u}{\lambda_l} \preceq \frac{\bar{\lambda}_u}{\bar{\lambda}_l}, \quad (61)$$

where the stochasticity on both sides is due to independent noise vectors  $w$ . On the other hand, if  $\text{span}(U_{S^c}) = \text{span}(U_A)$ , then PBHT cannot recover the signed support.

*Proof.* We have  $P_X = I_{n \times n}$ ,  $P_y = U_A U_A^\top$ . With this,  $\bar{w} = (U_A U_A^\top - I_{n \times n})X\beta^* + U_A U_A^\top w$ . Now let us consider the case that  $\text{span}(U_S) \subseteq \text{span}(U_A)$ . Using Lemma 2 we have

$$\bar{\mu}_j = X_j^\top X_S (X_S^\top X_S)^{-1} \text{sgn}(\beta_S^*) = \mu_j \quad (62)$$

$$\bar{\gamma}_i = e_i^\top \left( \frac{1}{n} X_S^\top X_S \right)^{-1} \text{sgn}(\beta_S^*) = \gamma_i \quad (63)$$

$$\bar{\eta}_j = \frac{1}{n} X_j^\top (I_{n \times n} - U_S U_S^\top) ((U_A U_A^\top - I_{n \times n})X\beta^* + U_A U_A^\top w) \quad (64)$$

$$= X_j^\top (I_{n \times n} - U_S U_S^\top) U_A U_A^\top \frac{w}{n} \quad (65)$$

$$\bar{\epsilon}_i = \frac{1}{n} e_i^\top \left( \frac{1}{n} X_S^\top X_S \right)^{-1} X_S^\top ((U_A U_A^\top - I_{n \times n})X\beta^* + U_A U_A^\top w) \quad (66)$$

$$= \frac{1}{n} e_i^\top \left( \frac{1}{n} X_S^\top X_S \right)^{-1} X_S^\top U_A U_A^\top w = \epsilon_i. \quad (67)$$

Since  $P_X = I_{n \times n}$ , we immediately see that if the conditions of Lemma 1 hold for the original problem, they continue to hold after preconditioning using PBHT. Furthermore, we see that  $\bar{\lambda}_u = \lambda_u$ . Next, we must show that  $\bar{\lambda}_l \preceq \lambda_l$ . We will approach this task in a similar manner as in Theorem 1. For completeness we repeat the main steps here. Note that

$$\bar{\lambda}_l = \max \left( \left\{ \frac{\bar{\eta}_j}{-1 - \bar{\mu}_j}, \frac{\bar{\eta}_j}{1 - \bar{\mu}_j} \right\}_{j \in S^c} \right) \quad \lambda_l = \max \left( \left\{ \frac{\eta_j}{-1 - \mu_j}, \frac{\eta_j}{1 - \mu_j} \right\}_{j \in S^c} \right). \quad (68)$$

As before, the effect of preconditioning on  $\eta_j$  can be viewed as further restricting the subspace in which the noise  $w$  lies, while keeping  $X_j$  and  $\mu_j$  fixed. Specifically, in  $\eta_j$ ,  $w$  is pre-multiplied by  $(I_{n \times n} - U_S U_S^\top)$ , while in  $\bar{\eta}_j$  it is pre-multiplied by  $(I_{n \times n} - U_S U_S^\top) U_A U_A^\top$ . Whatever  $U_A$ , the latter projection eliminates at least as large a subspace as the former and so because the  $X_j$  and  $\bar{\mu}_j = \mu_j$  are fixed, it follows that

$$\bar{\lambda}_l = \max \left( \left\{ \frac{\bar{\eta}_j}{-1 - \bar{\mu}_j}, \frac{\bar{\eta}_j}{1 - \bar{\mu}_j} \right\}_{j \in S^c} \right) \preceq \max \left( \left\{ \frac{\eta_j}{-1 - \mu_j}, \frac{\eta_j}{1 - \mu_j} \right\}_{j \in S^c} \right) = \lambda_l, \quad (69)$$

where the stochasticity is due to the noise  $w$ . The remaining part of the theorem again mirrors that of Theorem 1, which we repeat here for completeness. Rewriting some of the variables we observe that  $\bar{\lambda}_l$  and  $\lambda_l$  are both independent of  $\bar{\lambda}_u = \lambda_u$ . Specifically, if  $\text{span}(U_S) \subseteq \text{span}(U_A)$  then using Lemma 2

$$\eta_j = \frac{1}{n} X_j^\top (I_{n \times n} - U_S U_S^\top) w \quad (70)$$

$$\bar{\eta}_j = \frac{1}{n} X_j^\top (I_{n \times n} - U_S U_S^\top) U_A U_A^\top w \quad (71)$$

$$\epsilon_i = \frac{1}{n} e_i^\top \left( \frac{1}{n} X_S^\top X_S \right)^{-1} X_S^\top U_S U_S^\top w \quad (72)$$

$$= \bar{\epsilon}_i = \frac{1}{n} e_i^\top \left( \frac{1}{n} X_S^\top X_S \right)^{-1} X_S^\top U_S U_S^\top U_A U_A^\top w \quad (73)$$



Since  $(I_{n \times n} - U_S U_S^\top) w$  and  $U_S U_S^\top w$  are jointly Gaussian with zero covariance, they are independent. Thus,  $\eta_j$  and  $\epsilon_i = \bar{\epsilon}_i$  are independent and so are  $\lambda_l$  and  $\lambda_u = \bar{\lambda}_u$ . By similar reasoning,  $(I_{n \times n} - U_S U_S^\top) U_{\mathcal{A}} U_{\mathcal{A}}^\top w$  and  $U_S U_S^\top U_{\mathcal{A}} U_{\mathcal{A}}^\top w$  are independent, hence so are  $\bar{\lambda}_l$  and  $\bar{\lambda}_u = \lambda_u$ . We now combine these results: Because  $\bar{\lambda}_l \preceq \lambda_l$  and  $\bar{\lambda}_l \geq 0$ ,  $\lambda_l \geq 0$ , we have that  $1/\lambda_l \preceq 1/\bar{\lambda}_l$ . Next, because both  $1/\bar{\lambda}_l, 1/\lambda_l$  are independent of  $\bar{\lambda}_u = \lambda_u \geq 0$ , we have

$$\frac{\lambda_u}{\lambda_l} \preceq \frac{\bar{\lambda}_u}{\bar{\lambda}_l}, \quad (74)$$

On the other hand, if  $\text{span}(U_{S^c}) = \text{span}(U_{\mathcal{A}})$

$$\bar{\mu}_j = X_j^\top X_S (X_S^\top X_S)^{-1} \text{sgn}(\beta_S^*) = \mu_j \quad (75)$$

$$\bar{\gamma}_i = e_i^\top \left( \frac{1}{n} X_S^\top X_S \right)^{-1} \text{sgn}(\beta_S^*) = \gamma_i \quad (76)$$

$$\bar{\eta}_j = \frac{1}{n} X_j^\top (I_{n \times n} - U_S U_S^\top) ((U_{\mathcal{A}} U_{\mathcal{A}}^\top - I_{n \times n}) X \beta^* + U_{\mathcal{A}} U_{\mathcal{A}}^\top w) \quad (77)$$

$$= \frac{1}{n} X_j^\top (I_{n \times n} - U_S U_S^\top) w = \eta_j \quad (78)$$

$$\bar{\epsilon}_i = \frac{1}{n} e_i^\top \left( \frac{1}{n} X_S^\top X_S \right)^{-1} X_S^\top ((U_{\mathcal{A}} U_{\mathcal{A}}^\top - I_{n \times n}) X \beta^* + U_{\mathcal{A}} U_{\mathcal{A}}^\top w) \quad (79)$$

$$= \frac{1}{n} e_i^\top \left( \frac{1}{n} X_S^\top X_S \right)^{-1} X_S^\top (U_{\mathcal{A}} U_{\mathcal{A}}^\top w - X \beta^*) \quad (80)$$

$$= -e_i^\top (X_S^\top X_S)^{-1} X_S^\top X \beta^* \quad (81)$$

$$= -e_i^\top (X_S^\top X_S)^{-1} X_S^\top X_S \beta_S^* \quad (82)$$

$$= -\beta_i^* \quad (83)$$

Thus the conditions of Lemma 1 continue to hold and we have  $\bar{\lambda}_l = \lambda_l$  and

$$\bar{\lambda}_u = \min_{i \in S} \left| \frac{\beta_i^* + \bar{\epsilon}_i}{\bar{\gamma}_i} \right|_+ = \min_{i \in S} \left| \frac{\beta_i^* - \beta_i^*}{\bar{\gamma}_i} \right|_+ = 0 \quad (84)$$

Recall that in Section 3.2 of the main paper we defined  $\bar{\lambda}_u/\bar{\lambda}_l \triangleq 0$  if  $\bar{\lambda}_u = \bar{\lambda}_l = 0$ . Because  $\bar{\lambda}_l$  is with probability 1 non-negative, this means that with probability 1,  $\bar{\lambda}_u/\bar{\lambda}_l = 0$  and signed support recovery is not possible.  $\square$



## 4 Proofs of Section 5

**Lemma 3.** Assume that the spectra  $\Sigma_S, \Sigma_{S^c}$  are derived by normalizing unconstrained spectra  $\hat{\Sigma}_S$  and  $\hat{\Sigma}_{S^c}$  as

$$\Sigma_S = \frac{\hat{\Sigma}_S}{\|\hat{\Sigma}_S\|_F} \sqrt{kn} \quad (85)$$

$$\Sigma_{S^c} = \frac{\hat{\Sigma}_{S^c}}{\|\hat{\Sigma}_{S^c}\|_F} \sqrt{(p-k)n}. \quad (86)$$

Then the squared column norms of  $X$  are on expectation  $n$ .

*Proof.* We have  $\forall i \in S$ ,

$$E(X_i^\top X_i) = E(v_{S,i,\cdot} \Sigma_S^\top U^\top U \Sigma_S v_{S,i,\cdot}^\top) \quad (87)$$

$$= kn E \left( v_{S,i,\cdot} \frac{\hat{\Sigma}_S^\top \hat{\Sigma}_S}{\|\hat{\Sigma}_S\|_F^2} v_{S,i,\cdot}^\top \right) \quad (88)$$

$$= kn \sum_{i'=1}^k E(v_{S,i,i'}^2) \frac{\hat{\sigma}_{S,i'}^2}{\|\hat{\Sigma}_S\|_F^2} = n, \quad (89)$$

and  $\forall j \in S^c$ ,

$$E(X_j^\top X_j) = E(v_{S^c,j-k,\cdot} \Sigma_{S^c}^\top U^\top U \Sigma_{S^c} v_{S^c,j-k,\cdot}^\top) \quad (90)$$

$$= (p-k)n E \left( v_{S^c,j-k,\cdot} \frac{\hat{\Sigma}_{S^c}^\top \hat{\Sigma}_{S^c}}{\|\hat{\Sigma}_{S^c}\|_F^2} v_{S^c,j-k,\cdot}^\top \right) \quad (91)$$

$$= (p-k)n \sum_{j'=1}^{p-k} E(v_{S^c,j-k,j'}^2) \frac{\hat{\sigma}_{S^c,j'}^2}{\|\hat{\Sigma}_{S^c}\|_F^2} = n. \quad (92)$$

□



#### 4.1 Proof of Theorem 3

**Theorem 3.** Assume the Lasso problem was generated according to the generative model of Section 5.1 in the main paper with  $\forall i \in \sigma(S), \hat{\sigma}_{S,i} = 1, \hat{\sigma}_{S^c,i} = \kappa$  and  $\forall j \in \sigma(S^c), \hat{\sigma}_{S^c,j} = 1$  and that  $\kappa < \sqrt{n-k}/\sqrt{k(p-k-1)}$ . Then the conditions of Lemma 1 hold before and after preconditioning using JR. Moreover,

$$\frac{\bar{\lambda}_u}{\bar{\lambda}_l} = \frac{(p-k)}{n+p\kappa^2-k} \frac{\lambda_u}{\lambda_l}. \quad (93)$$

*Proof.* Normalizing  $\hat{\Sigma}_S$  and  $\hat{\Sigma}_{S^c}$  to yield  $\Sigma_S, \Sigma_{S^c}$ , as required by the model for  $X$ ,

$$\sigma_{S,i} = \frac{\sqrt{kn}}{\sqrt{k}} = \sqrt{n} \quad \forall i \in \sigma(S) \quad (94)$$

$$\sigma_{S^c,i} = \frac{\sqrt{n(p-k)}\kappa}{\sqrt{k\kappa^2+n-k}} \quad \forall i \in \sigma(S) \quad \sigma_{S^c,j} = \frac{\sqrt{n(p-k)}}{\sqrt{k\kappa^2+n-k}} \quad \forall j \in \sigma(S^c). \quad (95)$$

Because  $\Sigma_S$  has constant spectrum, it is easy to see that  $X_S^\top X_S = cI_{k \times k}$ , for some  $c > 0$ . This means that  $X_S^\top X_S$  is invertible and  $\text{sgn}(\beta_i^*)\gamma_i > 0$ . Let's look at the variables  $\mu_j$ :

$$|\mu_j| = |X_j^\top X_S (X_S^\top X_S)^{-1} \text{sgn}(\beta_S^*)| \quad (96)$$

$$= |v_{S^c,j-k,\cdot} \Sigma_{S^c}^\top U^\top U \Sigma_S V_S^\top (V_S \Sigma_S^\top U^\top U \Sigma_S V_S^\top)^{-1} \text{sgn}(\beta_S^*)| \quad (97)$$

$$= |v_{S^c,j-k,\cdot} \Sigma_{S^c}^\top \Sigma_S V_S^\top V_S (\Sigma_S^\top \Sigma_S)^{-1} V_S^\top \text{sgn}(\beta_S^*)| \quad (98)$$

$$= |v_{S^c,j-k,\cdot} \Sigma_{S^c}^\top \Sigma_S (\Sigma_S^\top \Sigma_S)^{-1} V_S^\top \text{sgn}(\beta_S^*)| \quad (99)$$

$$= \left| [v_{S^c,j-k,\cdot} \Sigma_{S^c}^\top]_{(1:k)} \Sigma_{S,(1:k),(1:k)}^{-1} V_S^\top \text{sgn}(\beta_S^*) \right| \quad (100)$$

$$= \left| \left[ v_{S^c,j-k,\cdot} \frac{\sqrt{n(p-k)}\kappa}{\sqrt{k\kappa^2+n-k}} \right]_{(1:k)} \frac{1}{\sqrt{n}} V_S^\top \text{sgn}(\beta_S^*) \right| \quad (101)$$

$$= \frac{\sqrt{(p-k)}\kappa}{\sqrt{k\kappa^2+n-k}} \left| [v_{S^c,j-k,\cdot}]_{(1:k)} V_S^\top \text{sgn}(\beta_S^*) \right| \quad (102)$$

$$\stackrel{\text{Cauchy}}{\leq} \frac{\sqrt{(p-k)}\kappa}{\sqrt{k\kappa^2+n-k}} \left\| V_S [v_{S^c,j-k,\cdot}]_{(1:k)}^\top \right\|_2 \left\| \text{sgn}(\beta_S^*) \right\|_2 \quad (103)$$

$$= \frac{\sqrt{k(p-k)}\kappa}{\sqrt{k\kappa^2+n-k}} \left\| V_S [v_{S^c,j-k,\cdot}]_{(1:k)}^\top \right\|_2 \quad (104)$$

$$\leq \frac{\sqrt{k(p-k)}\kappa}{\sqrt{k\kappa^2+n-k}} \|V_S\|_2 \left\| [v_{S^c,j-k,\cdot}]_{(1:k)} \right\|_2 \quad (105)$$

$$\leq \frac{\sqrt{k(p-k)}\kappa}{\sqrt{k\kappa^2+n-k}}. \quad (106)$$

Because  $\kappa < \sqrt{(n-k)/(k(p-k-1))}$ ,

$$\frac{\sqrt{k(p-k)}\kappa}{\sqrt{k\kappa^2+n-k}} < \frac{\sqrt{k(p-k)}\sqrt{\frac{n-k}{k(p-k-1)}}}{\sqrt{k\frac{n-k}{k(p-k-1)}+n-k}} \quad (107)$$

$$= \frac{\sqrt{\frac{(p-k)(n-k)}{p-k-1}}}{\sqrt{\frac{n-k+(n-k)(p-k-1)}{p-k-1}}} = \frac{\sqrt{\frac{(p-k)(n-k)}{p-k-1}}}{\sqrt{\frac{(n-k)(p-k)}{p-k-1}}} = 1, \quad (108)$$



and so the conditions of Lemma 1 are met. We can then apply Lemma 1 and simplify the resulting upper and lower bounds  $\lambda_u, \lambda_l$  on  $\lambda$ . Plugging in  $\Sigma_S$  and  $\Sigma_{S^c}$  we see that the data matrix  $X$  satisfies

$$XX^\top = U [\Sigma_S V_S^\top, \Sigma_{S^c} V_{S^c}^\top] [\Sigma_S V_S^\top, \Sigma_{S^c} V_{S^c}^\top]^\top U^\top \quad (109)$$

$$= U [\Sigma_S \Sigma_S^\top + \Sigma_{S^c} \Sigma_{S^c}^\top] U^\top \quad (110)$$

$$\triangleq U D D^\top U^\top. \quad (111)$$

From this we see that  $X = U D V^\top$  has left eigenvectors  $U$  and singular values

$$d_i = \sqrt{\sigma_{S,i}^2 + \sigma_{S^c,i}^2} = \sqrt{n + \frac{n(p-k)\kappa^2}{k\kappa^2 + n - k}} \quad \forall i \in \sigma(S) \quad (112)$$

$$d_j = \sqrt{\frac{n(p-k)}{k\kappa^2 + n - k}} \quad \forall j \in \sigma(S^c). \quad (113)$$

Recall that for JR,  $P_X = P_y = U (D D^\top)^{-1/2} U^\top$ . After projecting, we find that

$$\bar{\mu}_j = X_j^\top P_X^\top P_X X_S (X_S^\top P_X^\top P_X X_S)^{-1} \text{sgn}(\beta_S^*) \quad (114)$$

$$= |v_{S^c, j-k, \Sigma_{S^c}^\top U^\top P_X^\top P_X U \Sigma_S V_S^\top (V_S \Sigma_S^\top U^\top P_X^\top P_X U \Sigma_S V_S^\top)^{-1} \text{sgn}(\beta_S^*)}| \quad (115)$$

$$= \left| v_{S^c, j-k, \Sigma_{S^c}^\top} (D D^\top)^{-1} \Sigma_S V_S^\top \left( V_S \Sigma_S^\top (D D^\top)^{-1} \Sigma_S V_S^\top \right)^{-1} \text{sgn}(\beta_S^*) \right| \quad (116)$$

$$= \left| v_{S^c, j-k, \Sigma_{S^c}^\top} (D D^\top)^{-1} \Sigma_S \left( \Sigma_S^\top (D D^\top)^{-1} \Sigma_S \right)^{-1} V_S^\top \text{sgn}(\beta_S^*) \right| \quad (117)$$

$$= \left| v_{S^c, j-k, \Sigma_{S^c}^\top \Sigma_S (\Sigma_S^\top \Sigma_S)^{-1} V_S^\top \text{sgn}(\beta_S^*)} \right| = \mu_j \quad (118)$$

$$\bar{\gamma}_i = e_i^\top \left( \frac{1}{n} X_S^\top P_X^\top P_X X_S \right)^{-1} \text{sgn}(\beta_S^*) \quad (119)$$

$$= \left( n + \frac{n(p-k)\kappa^2}{k\kappa^2 + n - k} \right) e_i^\top \left( \frac{1}{n} X_S^\top X_S \right)^{-1} \text{sgn}(\beta_S^*) \quad (120)$$

$$= \left( n + \frac{n(p-k)\kappa^2}{k\kappa^2 + n - k} \right) \gamma_i \quad (121)$$



$$\bar{\eta}_j = X_j^\top P_X^\top (I_{n \times n} - P_X X_S (X_S^\top P_X^\top P_X X_S)^{-1} X_S^\top P_X^\top) \frac{\bar{w}}{n} \quad (122)$$

$$= v_{S^c, j-k, \cdot} \Sigma_{S^c}^\top U^\top P_X^\top (I_{n \times n} - P_X U \Sigma_S V_S^\top (V_S \Sigma_S^\top U^\top P_X^\top P_X U \Sigma_S V_S^\top)^{-1} V_S \Sigma_S^\top U^\top P_X^\top) \frac{P_X w}{n} \quad (123)$$

$$= v_{S^c, j-k, \cdot} \Sigma_{S^c}^\top (DD^\top)^{-1/2} U^\top \left( I_{n \times n} - U (DD^\top)^{-1/2} \Sigma_S \left( \Sigma_S^\top (DD^\top)^{-1} \Sigma_S \right)^{-1} \Sigma_S^\top (DD^\top)^{-1/2} U^\top \right) \frac{P_X w}{n} \quad (124)$$

$$= v_{S^c, j-k, \cdot} \Sigma_{S^c}^\top (DD^\top)^{-1/2} U^\top (I_{n \times n} - U_S U_S^\top) \frac{P_X w}{n} \quad (125)$$

$$= v_{S^c, j-k, \cdot} \Sigma_{S^c}^\top (DD^\top)^{-1/2} \left( U^\top - \begin{bmatrix} I_{k \times k} \\ 0 \end{bmatrix} U_S^\top \right) \frac{P_X w}{n} \quad (126)$$

$$= v_{S^c, j-k, \cdot} \Sigma_{S^c}^\top (DD^\top)^{-1/2} \begin{bmatrix} 0 \\ U_S^\top \end{bmatrix} \frac{P_X w}{n} \quad (127)$$

$$= \left[ v_{S^c, j-k, \cdot} \Sigma_{S^c}^\top (DD^\top)^{-1/2} \right]_{(k+1:n)} U_S^\top \frac{P_X w}{n} \quad (128)$$

$$= \left[ v_{S^c, j-k, \cdot} \Sigma_{S^c}^\top (DD^\top)^{-1/2} \right]_{(k+1:n)} \begin{bmatrix} 0 & I_{n-k \times n-k} \end{bmatrix} (DD^\top)^{-1/2} U^\top \frac{w}{n} \quad (129)$$

$$= \left[ v_{S^c, j-k, \cdot} \Sigma_{S^c}^\top (DD^\top)^{-1/2} \right]_{(k+1:n)} \begin{bmatrix} 0 & D_{(k+1:n), (k+1:n)}^{-1} \end{bmatrix} U^\top \frac{w}{n} \quad (130)$$

$$= \left[ v_{S^c, j-k, \cdot} \Sigma_{S^c}^\top (DD^\top)^{-1/2} \right]_{(k+1:n)} D_{(k+1:n), (k+1:n)}^{-1} U_S^\top \frac{w}{n} \quad (131)$$

$$= \left[ v_{S^c, j-k, \cdot} \Sigma_{S^c}^\top \right]_{(k+1:n)} D_{(k+1:n), (k+1:n)}^{-2} U_S^\top \frac{w}{n} \quad (132)$$

$$= \frac{1}{n(p-k)/(k\kappa^2 + n - k)} \left[ v_{S^c, j-k, \cdot} \Sigma_{S^c}^\top \right]_{(k+1:n)} U_S^\top \frac{w}{n} \quad (133)$$

$$= \frac{1}{n(p-k)/(k\kappa^2 + n - k)} \bar{\eta}_j \quad (134)$$

$$\bar{\epsilon}_i = e_i^\top \left( \frac{1}{n} X_S^\top P_X^\top P_X X_S \right)^{-1} X_S^\top P_X^\top P_X \frac{w}{n} \quad (135)$$

$$= e_i^\top \left( \frac{1}{n} X_S^\top X_S \right)^{-1} X_S^\top \frac{w}{n} = \epsilon_i \quad (136)$$

$$(137)$$

Immediately we see that the conditions of Lemma 1 continue to hold after preconditioning using JR. Note that by the above derivation  $(2\llbracket \bar{\eta}_j > 0 \rrbracket - 1) - \bar{\mu}_j = (2\llbracket \eta_j > 0 \rrbracket - 1) - \mu_j$ , and so

$$\bar{\lambda}_l = \max_{j \in S^c} \frac{\bar{\eta}_j}{(2\llbracket \bar{\eta}_j > 0 \rrbracket - 1) - \bar{\mu}_j} = \frac{1}{n(p-k)/(k\kappa^2 + n - k)} \max_{j \in S^c} \frac{\eta_j}{(2\llbracket \eta_j > 0 \rrbracket - 1) - \mu_j} \quad (138)$$

$$= \frac{1}{n(p-k)/(k\kappa^2 + n - k)} \lambda_l \quad (139)$$

$$\bar{\lambda}_u = \min_{i \in S} \left| \frac{\beta_i^* + \bar{\epsilon}_i}{\bar{\gamma}_i} \right|_+ = \frac{1}{n + (n(p-k)\kappa^2/(k\kappa^2 + n - k))} \min_{i \in S} \left| \frac{\beta_i^* + \epsilon_i}{\gamma_i} \right|_+ \quad (140)$$

$$= \frac{1}{n + (n(p-k)\kappa^2/(k\kappa^2 + n - k))} \lambda_u. \quad (141)$$



The new ratio  $\bar{\lambda}_u/\bar{\lambda}_l$  of upper and lower bounds then becomes

$$\frac{\bar{\lambda}_u}{\bar{\lambda}_l} = \frac{n(p-k)/(k\kappa^2 + n - k)}{n + (n(p-k)\kappa^2/(k\kappa^2 + n - k))} \frac{\lambda_u}{\lambda_l} \quad (142)$$

$$= \frac{n(p-k)}{n(k\kappa^2 + n - k) + n(p-k)\kappa^2} \frac{\lambda_u}{\lambda_l} \quad (143)$$

$$= \frac{p-k}{(k\kappa^2 + n - k) + (p-k)\kappa^2} \frac{\lambda}{\lambda_l} \quad (144)$$

$$= \frac{p-k}{n + p\kappa^2 - k} \frac{\lambda_u}{\lambda_l}. \quad (145)$$

□



## 4.2 Gaussian Designs with Piecewise Constant Spectra

The generative model presented in Section 5.1 of the paper uses an *orthonormal* column basis  $U$  to generate  $X$ . The question arises whether a more natural Gaussian design  $X$  exists that is in a sense equivalent to the orthonormal construction of Section 5.1. In this section we present a generative model that uses a Gaussian column “basis” that achieves this. As before, let  $V_S$  and  $V_{S^c}$  be random orthonormal bases of sizes  $k \times k$  and  $p - k \times p - k$  respectively and let  $\Sigma_S$  and  $\Sigma_{S^c}$  be rectangular matrices that are derived from matrices  $\hat{\Sigma}_S, \hat{\Sigma}_{S^c}$  as in Section 5.1 of the paper. Let  $W^m$  be an  $m \times n$  matrix of independent Gaussians with marginal distribution  $\mathcal{N}(0, 1)$ . Then we let

$$X^m = \frac{1}{\sqrt{n}} W^m [\Sigma_S V_S^\top, \Sigma_{S^c} V_{S^c}^\top]. \quad (146)$$

We note that all columns of  $X$  are mean zero, and their squared norms are on expectation  $m$ :

$$E(X_i^m) = E(X e_i) = \frac{1}{\sqrt{n}} E(W^m [\Sigma_S V_S^\top, \Sigma_{S^c} V_{S^c}^\top] e_i) \quad (147)$$

$$= \frac{1}{\sqrt{n}} E(W^m) E([\Sigma_S V_S^\top, \Sigma_{S^c} V_{S^c}^\top] e_i) = 0 \quad (148)$$

$$E(X_i^m{}^\top X_i^m) = E(e_i^\top X^\top X e_i) \quad (149)$$

$$= \frac{1}{n} E(e_i^\top [\Sigma_S V_S^\top, \Sigma_{S^c} V_{S^c}^\top]^\top W^{m\top} W^m [\Sigma_S V_S^\top, \Sigma_{S^c} V_{S^c}^\top] e_i) \quad (150)$$

$$= \frac{m}{n} E(e_i^\top [\Sigma_S V_S^\top, \Sigma_{S^c} V_{S^c}^\top]^\top [\Sigma_S V_S^\top, \Sigma_{S^c} V_{S^c}^\top] e_i) \quad (151)$$

$$= \begin{cases} \frac{m}{n} \sum_{i'=1}^k E(v_{S,i,i'}^2) \sigma_{S,i'}^2 = m & \text{if } i \in S \\ \frac{m}{n} \sum_{i'=1}^{n-k} E(v_{S^c,i-k,i'}^2) \sigma_{S^c,i'}^2 = m & \text{if } i \in S^c \end{cases} \quad (152)$$

Moreover, if  $V_S, V_{S^c}$  are fixed, then the rows of  $X$  are jointly Gaussian and

$$E(X^m{}^\top X^m) = \frac{1}{n} [\Sigma_S V_S^\top, \Sigma_{S^c} V_{S^c}^\top]^\top E(W^{m\top} W^m) [\Sigma_S V_S^\top, \Sigma_{S^c} V_{S^c}^\top] \quad (153)$$

$$= \frac{m}{n} [\Sigma_S V_S^\top, \Sigma_{S^c} V_{S^c}^\top]^\top [\Sigma_S V_S^\top, \Sigma_{S^c} V_{S^c}^\top]. \quad (154)$$

So if  $m = n$ , the covariance matches empirical covariance of  $X$  constructed in Section 5.1 with  $V_S, V_{S^c}$  fixed. The standard Lasso application considers problems in which the noise vector has fixed variance:  $w \sim \mathcal{N}(0, \sigma^2 I_{n \times n})$ . In the next section we let the variance grow as  $\sigma^2 m/n$  (i.e., we use noise vectors  $w^m \sim \mathcal{N}(0, (\sigma^2 m/n) I_{m \times m})$ ) and see how the induced ratio of penalty parameter bounds behaves as  $m \rightarrow \infty$ . Growing the number of observations and noise variance simultaneously ensures that the problem doesn't become too easy.



### 4.3 Convergence of bounds ratios

For some fixed  $V_S, V_{S^c}, \Sigma_S, \Sigma_{S^c}$ , and  $\beta^*$  generate the following two independent Lasso problems.

$$y = X\beta^* + w \quad X = U [\Sigma_S V_S^\top, \Sigma_{S^c} V_{S^c}^\top] \quad w \sim \mathcal{N}(0, \sigma^2 I_{n \times n}) \quad (155)$$

$$y^m = X^m \beta^* + w^m \quad X^m = \frac{1}{\sqrt{n}} W^m [\Sigma_S V_S^\top, \Sigma_{S^c} V_{S^c}^\top] \quad w^m \sim \mathcal{N}\left(0, \frac{\sigma^2 m}{n} I_{m \times m}\right), \quad (156)$$

where  $U$  is a randomly chosen  $n \times n$  orthonormal basis,  $W^m$  is a random  $m \times n$  Gaussian ensemble, and the noise vectors  $w$  and  $w^m$  are independent. Now, let  $\lambda_u/\lambda_l$  be the ratio of penalty parameter bounds induced by Lemma 1 for the orthonormal construction in Eq. (155) and  $\lambda_u^m/\lambda_l^m$  the ratio of penalty parameter bounds for the Gaussian construction in Eq. (156). We will show the following.

**Theorem 4.** *Let  $V_S, V_{S^c}, \Sigma_S, \Sigma_{S^c}$  and  $\beta^*$  be fixed. If the conditions of Lemma 1 hold for  $X, \beta^*$ , then for  $m$  large enough they will hold for  $X^m, \beta^*$ . Furthermore, as  $m \rightarrow \infty$*

$$\frac{\lambda_u^m}{\lambda_l^m} \xrightarrow{d} \frac{\lambda_u}{\lambda_l}, \quad (157)$$

where the stochasticity on the left is due to  $W^m, w^m$  and on the right is due to  $w$ .

*Proof.* Let the variables introduced by Lemma 1 for the orthogonal model in Eq. (155) be  $\lambda, \lambda_l, \lambda_u, \epsilon_i, \gamma_i, \mu_j$  and  $\eta_j$ . Let the corresponding variables for the Gaussian model of Eq. (156) be  $\lambda^m, \lambda_l^m, \lambda_u^m, \epsilon_i^m, \gamma_i^m, \mu_j^m$  and  $\eta_j^m$ . Similarly, let the counterparts to  $X_S$  and  $X_j$  be  $X_S^m$  and  $X_j^m$ .

Since we assumed that  $V_S, V_{S^c}, \Sigma_S, \Sigma_{S^c}, \beta^*$  are fixed, we first show that  $\gamma_i^m$  and  $\mu_j^m$  converge to the constants  $\gamma_i, \mu_j$ . Using the Strong Law of Large Numbers and the Continuous Mapping Theorem,

$$\lim_{m \rightarrow \infty} \frac{1}{m} X^{m\top} X^m = \lim_{m \rightarrow \infty} \frac{1}{mn} [\Sigma_S V_S^\top, \Sigma_{S^c} V_{S^c}^\top]^\top W^{m\top} W^m [\Sigma_S V_S^\top, \Sigma_{S^c} V_{S^c}^\top] \quad (158)$$

$$\stackrel{a.s.}{=} \frac{1}{n} X^\top X \quad (159)$$

This means that all inner products of columns of  $X^m/\sqrt{m}$  converge. Then, assuming the conditions of Lemma 1 hold,

$$\lim_{m \rightarrow \infty} \gamma_i^m = \lim_{m \rightarrow \infty} e_i^\top \left( \frac{1}{m} X_S^{m\top} X_S^m \right)^{-1} \text{sgn}(\beta_S^*) \quad (160)$$

$$\stackrel{a.s.}{=} e_i^\top \left( \frac{1}{n} X_S^\top X_S \right)^{-1} \text{sgn}(\beta_S^*) = \gamma_i \quad (161)$$

$$\lim_{m \rightarrow \infty} \mu_j^m = \lim_{m \rightarrow \infty} X_j^{m\top} X_S^m (X_S^{m\top} X_S^m)^{-1} \text{sgn}(\beta_S^*) \quad (162)$$

$$= \lim_{m \rightarrow \infty} \frac{X_j^{m\top} X_S^m}{m} \left( \frac{1}{m} X_S^{m\top} X_S^m \right)^{-1} \text{sgn}(\beta_S^*) \quad (163)$$

$$\stackrel{a.s.}{=} \frac{X_j^\top X_S}{n} \left( \frac{1}{n} X_S^\top X_S \right)^{-1} \text{sgn}(\beta_S^*) = \mu_j \quad (164)$$

Thus, if the conditions of Lemma 1 hold for  $X, \beta^*$ , there is an  $m_0$  so that if  $m > m_0$  the conditions are also met by  $X^m, \beta^*$ . Assume from now on the conditions are met. By Lemma 1, signed support recovery requires that

$$\lambda^m < \lambda_u^m = \min_{i \in S} \left| \frac{\beta_i^* + \epsilon_i^m}{\gamma_i^m} \right|_+ \quad (165)$$

$$\lambda^m > \lambda_l^m = \max_{j \in S^c} \frac{\eta_j^m}{(2\mathbb{I}[\eta_j^m > 0] - 1) - \mu_j^m}. \quad (166)$$

We will show that  $\lambda_u^m/\lambda_l^m \xrightarrow{d} \lambda_u/\lambda_l$ , where the randomness on the left hand side is due to  $W^m, w^m$  and the randomness in the right limit is due to the noise  $w$  in the  $\epsilon_i$  and  $\eta_j$ . To show this convergence,



observe that we can (with probability 1) write  $\lambda_u/\lambda_l$  as a continuous function of  $\beta_i^*, \epsilon_i, \gamma_i, i \in S, \eta_j, \mu_j, j \in S^c$ , since we have that  $\gamma_i > 0, \mu_j \in (-1, +1)$ , and  $\mathbb{P}(\max_j \eta_j = 0) = 0$  if  $\sigma^2 > 0^3$ . By the Continuous Mapping Theorem, convergence in distribution of  $\lambda_u^m/\lambda_l^m$  could then be guaranteed if we had the following joint convergence in distribution

$$\begin{bmatrix} \{\epsilon_i^m\}_{i \in S} \\ \{\gamma_i^m\}_{i \in S} \\ \{\eta_j^m\}_{j \in S^c} \\ \{\mu_j^m\}_{j \in S^c} \end{bmatrix} \xrightarrow{d} \begin{bmatrix} \{\epsilon_i\}_{i \in S} \\ \{\gamma_i\}_{i \in S} \\ \{\eta_j\}_{j \in S^c} \\ \{\mu_j\}_{j \in S^c} \end{bmatrix}. \quad (167)$$

Because  $\mu_j^m$  and  $\gamma_i^m$  converge to constants  $\mu_j, \gamma_i$ , it remains to be shown that

$$\begin{bmatrix} \{\epsilon_i^m\}_{i \in S} \\ \{\eta_j^m\}_{j \in S^c} \end{bmatrix} \xrightarrow{d} \begin{bmatrix} \{\epsilon_i\}_{i \in S} \\ \{\eta_j\}_{j \in S^c} \end{bmatrix}. \quad (168)$$

To simplify notation, we will show only the marginal convergence, letting it be understood that the argument holds jointly. Using the Strong Law of Large Numbers and Slutsky's Lemma,

$$\lim_{m \rightarrow \infty} \epsilon_i^m = \lim_{m \rightarrow \infty} e_i^\top \left( \frac{1}{m} X_S^{m\top} X_S^m \right)^{-1} X_S^{m\top} \frac{w^m}{m} \quad (169)$$

$$\stackrel{d}{=} \lim_{m \rightarrow \infty} e_i^\top \left( \frac{1}{n} X_S^\top X_S \right)^{-1} X_S^{m\top} \frac{w^m}{m} \quad (170)$$

$$\stackrel{d}{=} \lim_{m \rightarrow \infty} \frac{1}{\sqrt{n}} e_i^\top \left( \frac{1}{n} X_S^\top X_S \right)^{-1} V_S \Sigma_S^\top W^{m\top} \frac{w^m}{m} \quad (171)$$

$$\lim_{m \rightarrow \infty} \eta_j^m = \lim_{m \rightarrow \infty} X_j^{m\top} \left( I_{m \times m} - X_S^m (X_S^{m\top} X_S^m)^{-1} X_S^{m\top} \right) \frac{w^m}{m} \quad (172)$$

$$\stackrel{d}{=} \lim_{m \rightarrow \infty} X_j^{m\top} \left( I_{m \times m} - \frac{1}{m} X_S^m \left( \frac{1}{m} X_S^{m\top} X_S^m \right)^{-1} X_S^{m\top} \right) \frac{w^m}{m} \quad (173)$$

$$\stackrel{d}{=} \lim_{m \rightarrow \infty} X_j^{m\top} \left( I_{m \times m} - \frac{1}{m} X_S^m \left( \frac{1}{n} X_S^\top X_S \right)^{-1} X_S^{m\top} \right) \frac{w^m}{m} \quad (174)$$

$$\stackrel{d}{=} \lim_{m \rightarrow \infty} X_j^{m\top} \left( I_{m \times m} - \frac{1}{mn} W^m \Sigma_S V_S^\top \left( \frac{1}{n} V_S \Sigma_S^\top \Sigma_S V_S^\top \right)^{-1} V_S \Sigma_S^\top W^{m\top} \right) \frac{w^m}{m} \quad (175)$$

$$\stackrel{d}{=} \lim_{m \rightarrow \infty} X_j^{m\top} \left( I_{m \times m} - \frac{1}{m} W^m \Sigma_S (\Sigma_S^\top \Sigma_S)^{-1} \Sigma_S^\top W^{m\top} \right) \frac{w^m}{m} \quad (176)$$

$$\stackrel{d}{=} \lim_{m \rightarrow \infty} \frac{1}{\sqrt{n}} v_{S^c, j-k, \cdot} \Sigma_{S^c}^\top W^{m\top} \left( I_{m \times m} - \frac{1}{m} W_S^m W_S^{m\top} \right) \frac{w^m}{m} \quad (177)$$

$$\stackrel{d}{=} \lim_{m \rightarrow \infty} \frac{1}{\sqrt{n}} v_{S^c, j-k, \cdot} \Sigma_{S^c}^\top \left( W^{m\top} - \frac{1}{m} W^{m\top} W_S^m W_S^{m\top} \right) \frac{w^m}{m} \quad (178)$$

$$\stackrel{d}{=} \lim_{m \rightarrow \infty} \frac{1}{\sqrt{n}} v_{S^c, j-k, \cdot} \Sigma_{S^c}^\top \left( W^{m\top} - \begin{bmatrix} I_{k \times k} \\ 0 \end{bmatrix} W_S^{m\top} \right) \frac{w^m}{m} \quad (179)$$

$$\stackrel{d}{=} \lim_{m \rightarrow \infty} \frac{1}{\sqrt{n}} [v_{S^c, j-k, \cdot} \Sigma_{S^c}^\top]_{(k+1:n)} W_S^{m\top} \frac{w^m}{m} \quad (180)$$

Observe that since  $V_S, V_{S^c}, \Sigma_S, \Sigma_{S^c}$  are fixed, the joint limit distribution of  $[\{\epsilon_i^m\}_{i \in S}, \{\eta_j^m\}_{j \in S^c}]$  is determined by the limit distribution of the *shared* random variable  $W^{m\top} w^m/m$ . The following lemma allows us to exploit this

**Lemma 4.** *Let  $U$  be a (possibly random)  $n \times n$  orthonormal matrix and  $w \sim \mathcal{N}(0, \sigma^2 I_{n \times n})$ . Then*

$$W^{m\top} \frac{w^m}{m} \xrightarrow{d} U^\top \frac{w}{\sqrt{n}}, \quad (181)$$

<sup>3</sup>To see this, note that  $[v_{S^c, j-k, \cdot} \Sigma_{S^c}^\top]_{(k+1:n)}$  cannot be zero for all  $j \in S^c$ .



*Proof.* We show that for an independent  $z \sim \mathcal{N}(0, \sigma^2 I_{m \times m})$

$$W^m \top \frac{w^m}{m} \xrightarrow{d} \lim_{m \rightarrow \infty} W^m \top \frac{w^m}{m} \stackrel{d}{=} \lim_{m \rightarrow \infty} W^m \top \frac{z}{\sqrt{mn}} \stackrel{d}{=} \lim_{m \rightarrow \infty} W^m \top \frac{\sigma z}{\|z\|_2 \sqrt{n}} \stackrel{d}{=} U \top \frac{w}{\sqrt{n}} \quad (182)$$

By simple application of the Central Limit Theorem to  $W^m \top z / \sqrt{m}$  we see that the marginals of the third random variable are Gaussian. To clarify the dependency structure between the variables, we have further modified the statement by explicitly normalizing  $z$  on the right. We can do this using Slutsky's Lemma, because by the Strong Law of Large Numbers  $\|z\|_2 / \sqrt{m} \xrightarrow{a.s.} \sigma$ . Now, since the elements of  $W^m$  are independent standard Gaussians, and  $z$  has been normalized to unit length, the limit distribution on the right consists of independent zero-mean Gaussians with variance  $\sigma^2/n$ .  $\square$

Because  $V_S, V_{S^c}, \Sigma_S, \Sigma_{S^c}$  are fixed, we can use Lemma 4 to conclude that jointly

$$\begin{bmatrix} \{\epsilon_i^m\}_{i \in S} \\ \{\eta_j^m\}_{j \in S^c} \end{bmatrix} \xrightarrow{d} \begin{bmatrix} \left\{ e_i^\top \left( \frac{1}{n} X_S^\top X_S \right)^{-1} V_S \Sigma_S^\top U \top \frac{w}{n} \right\}_{i \in S} \\ \left\{ [v_{S^c, j-k, \cdot}^\top \Sigma_{S^c}^\top]_{(k+1:n)} U_{S^c}^\top \frac{w}{n} \right\}_{j \in S^c} \end{bmatrix} \stackrel{d}{=} \begin{bmatrix} \{\epsilon_i\}_{i \in S} \\ \{\eta_j\}_{j \in S^c} \end{bmatrix}. \quad (183)$$

Finally, an application of the Continuous Mapping Theorem to  $\epsilon_i^m, \gamma_i^m, \eta_j^m, \mu_j^m$  then establishes that

$$\frac{\lambda_u^m}{\lambda_l^m} \xrightarrow{d} \frac{\lambda_u}{\lambda_l}. \quad (184)$$

$\square$



## References

- [1] J.C. Huang and N. Jovic. Variable selection through Correlation Sifting. In V. Bafna and S.C. Sahinalp, editors, *RECOMB*, volume 6577 of *Lecture Notes in Computer Science*, pages 106–123. Springer, 2011.
- [2] D. Paul, E. Bair, T. Hastie, and R. Tibshirani. “Preconditioning” for feature selection and regression in high-dimensional problems. *Annals of Statistics*, 36(4):1595–1618, 2008.
